# Supplementary material
Source: PubMed Central journal article supplement (PMC7935762)
Supplement: NIHMS1663386-supplement-1.pdf [file NIHMS1663386-supplement-1.pdf]

Figure S1

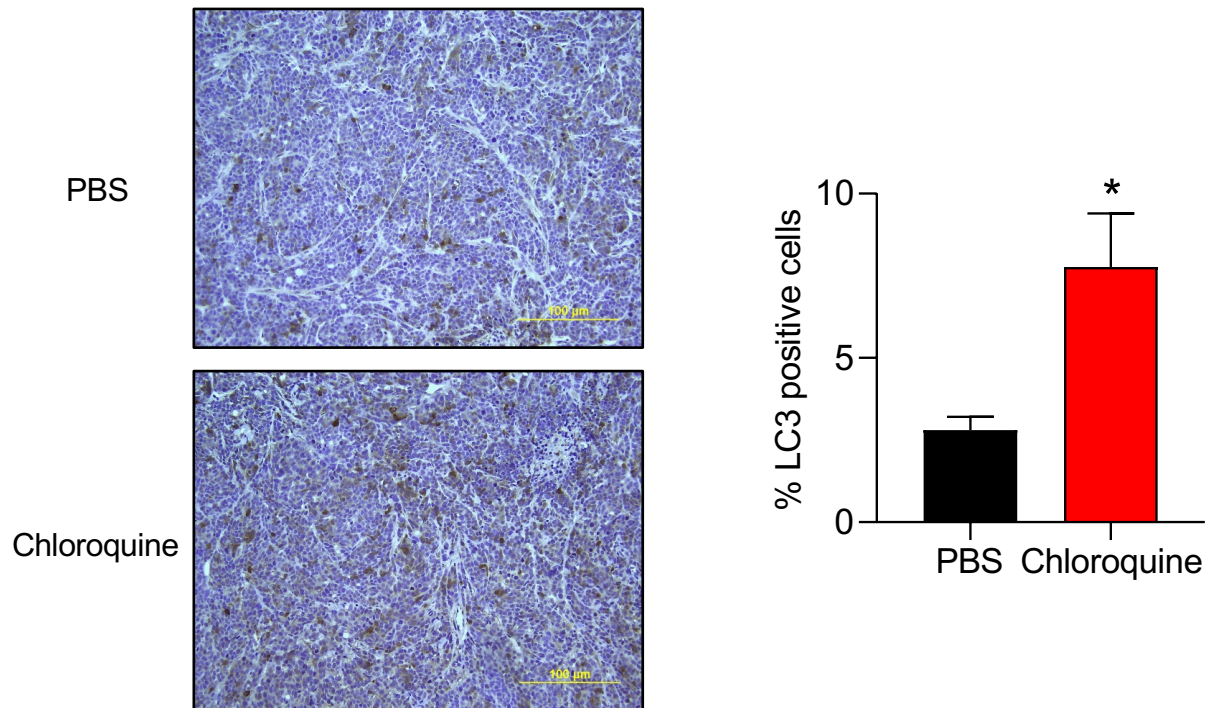

**Supplementary Figure S1.** LC3 IHC staining (*left*) and quantification (*right*) of 22Rv1-fLuc xenograft mouse tumors from vehicle (PBS) or chloroquine treatment groups. *P* values were calculated using a two-tailed t test. \**P* < 0.05.

# Figure S2

A

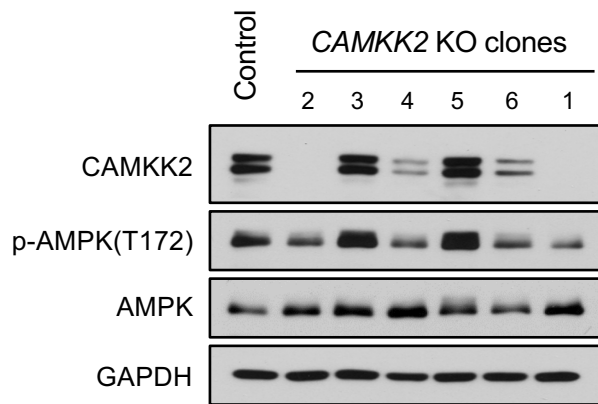

B

---

**C4-2 Cas9 Control (WT *CAMKK2*)**

5'-CCGTGACATCAAACCTTCCA-3'

---

**KO clone-1 (Heterozygous)**

5'-CCG—ACATCAAACCTTCCA-3' (deletion)

5'-CCGGTGACATCAAACCTTCCA-3' (insertion)

---

**KO clone-2 (Homozygous)**

5'-CCGITGACATCAAACCTTCCA-3' (insertion)

---

**Supplementary Figure S2.** (A) sgRNAs targeting *CAMKK2* were expressed in C4-2 inducible Cas9 cells and single cell clones were selected after DOX (200 ng/ml) treatment. Immunoblot analysis of these clones and their parental C4-2 Cas9 cells. Note, the clone numbers here were matched for clarity with the numbering throughout the main text and figures. (B) Sanger sequence of C4-2 Cas9 cells and its derivatives *CAMKK2* KO clone 1 and clone 2. Red dashes and letters indicate the identified mutations.

# Figure S3

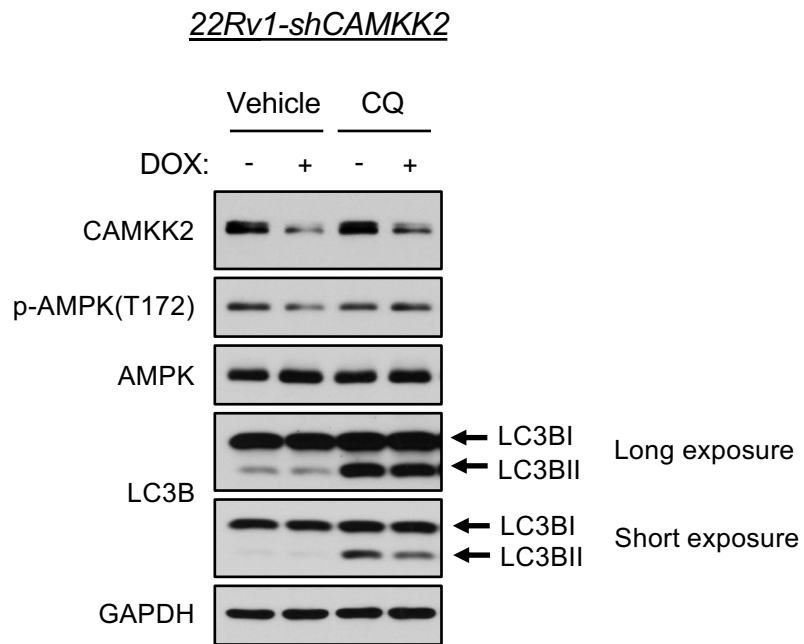

**Supplementary Figure S3.** Immunoblot analysis of 22Rv1-shCAMKK2 cells  $\pm$  800 ng/ml DOX  $\pm$  20  $\mu$ M chloroquine treatment for 72 hours.

Figure S4

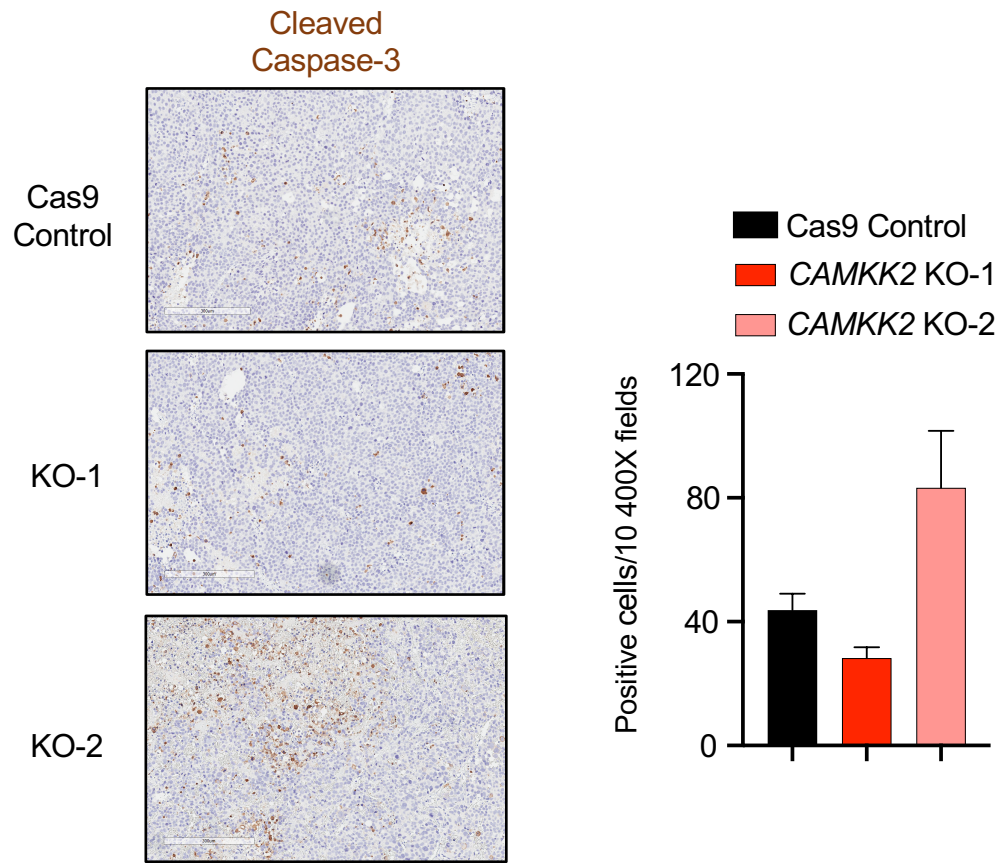

**Supplementary Figure S4.** Cleaved caspase-3 IHC staining and quantification of C4-2 Cas9 control and *CAMKK2* knockout (KO) xenograft tumors.

# Figure S5

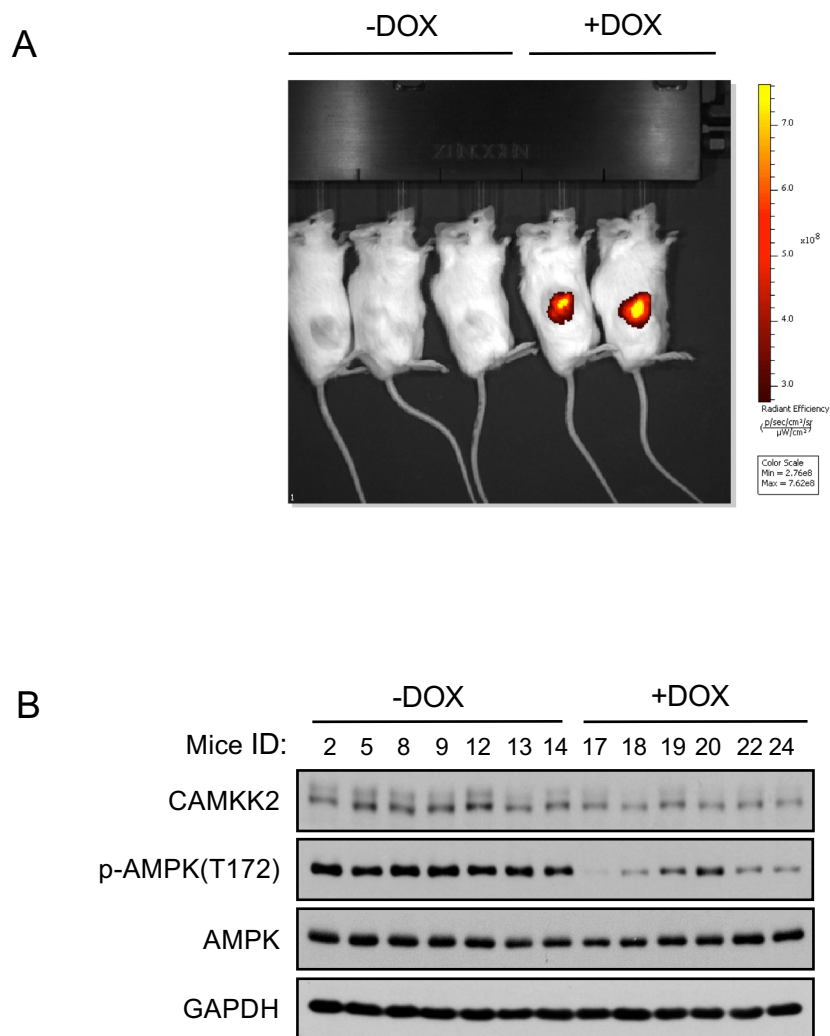

**Supplementary Figure S5.** (A) Fluorescence imaging of 5 sample mice (3 on normal chow, 2 on DOX-containing chow) confirming the *CAMKK2* shRNA expression. (B) Immunoblot analysis of tumors from 22Rv1-sh*CAMKK2* xenograft mice  $\pm$  DOX.

# Figure S6

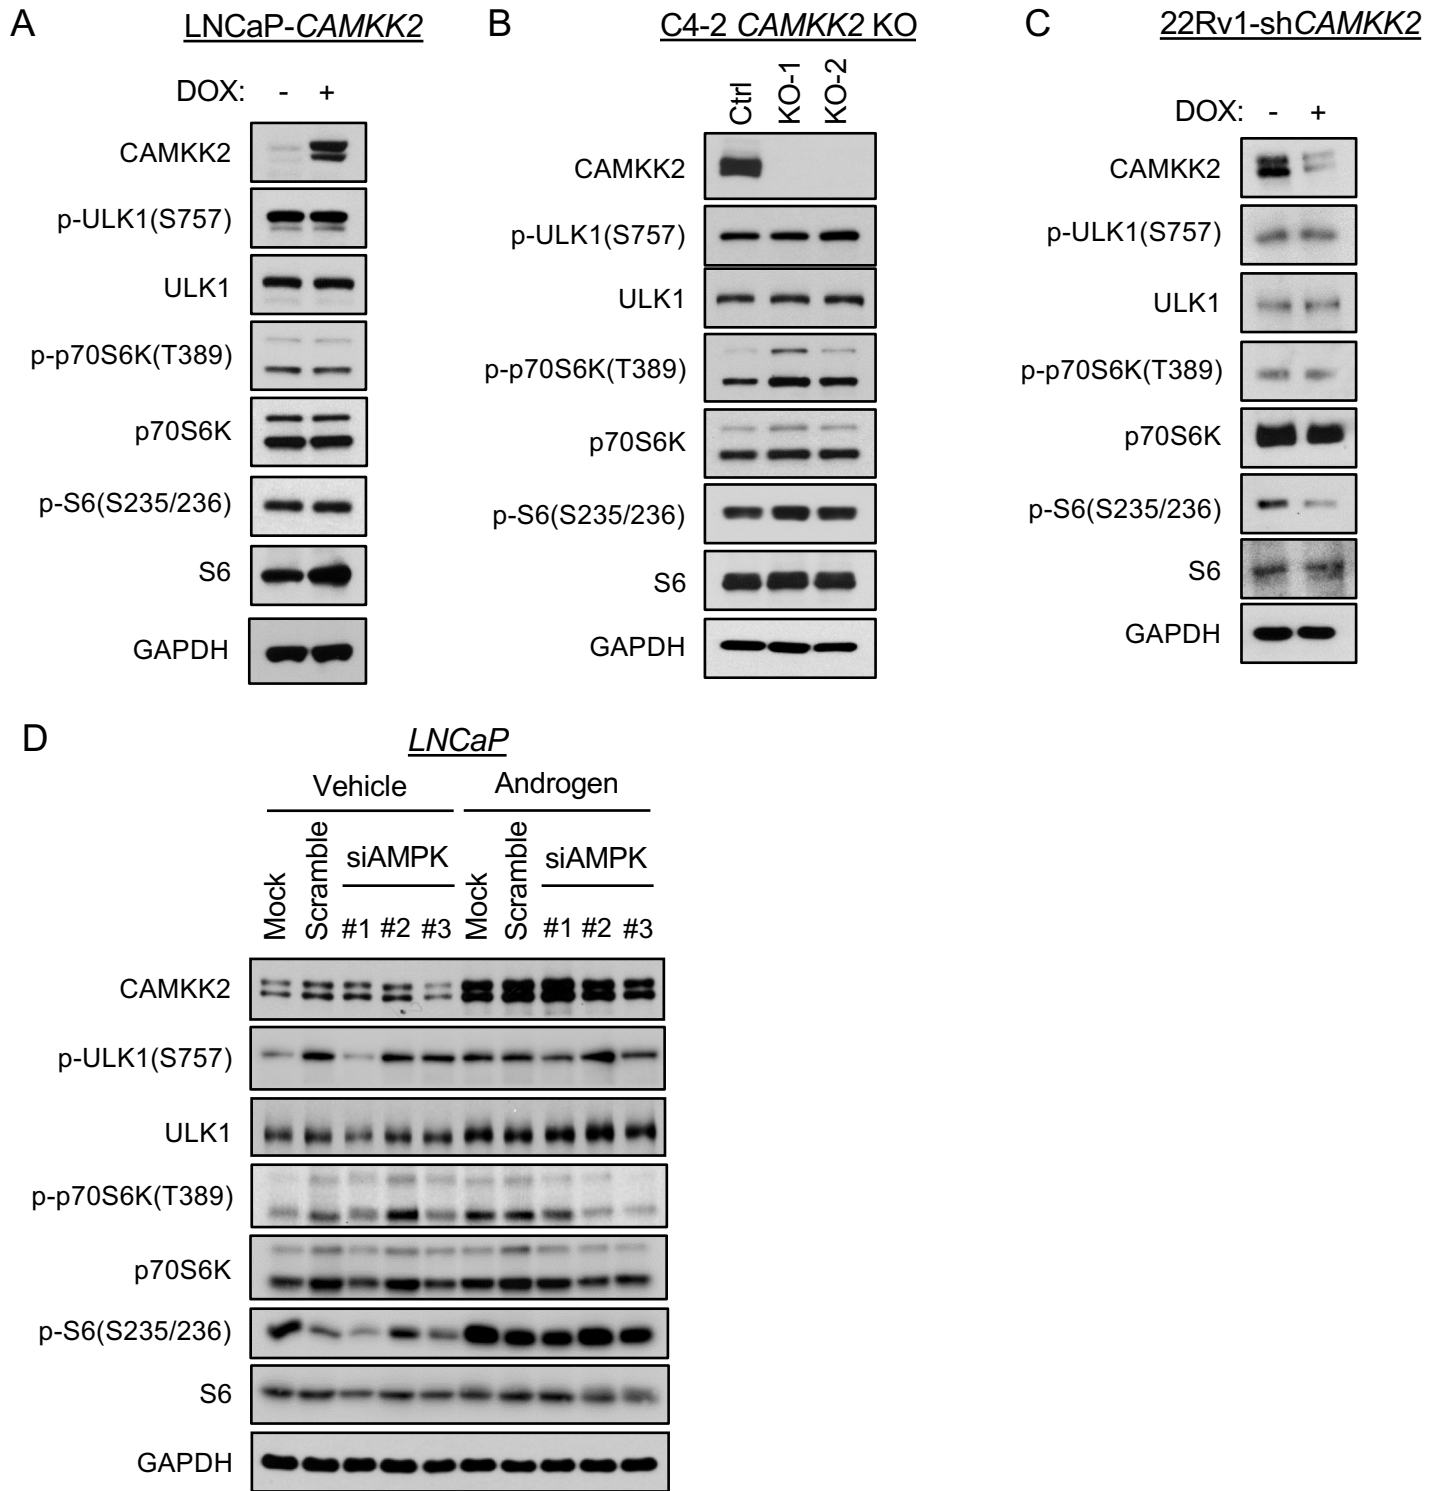

**Supplementary Figure S6.** (A) LNCaP-CAMKK2 cells treated  $\pm$  DOX (50 ng/ml) for 48 hours. Cell lysates were subjected to immunoblot analysis. (B) Immunoblot analysis of C4-2 Cas9 control and CAMKK2 knockout (KO) cells. (C) 22Rv1-shCAMKK2 cells treated  $\pm$  DOX (800 ng/ml) for 48 hours. Cell lysates were subjected to immunoblot analysis. (D) Immunoblot analysis of parental LNCaP cells treated with siRNAs targeting either scramble or AMPK  $\pm$  R1881 for 72 hours.

Figure S7

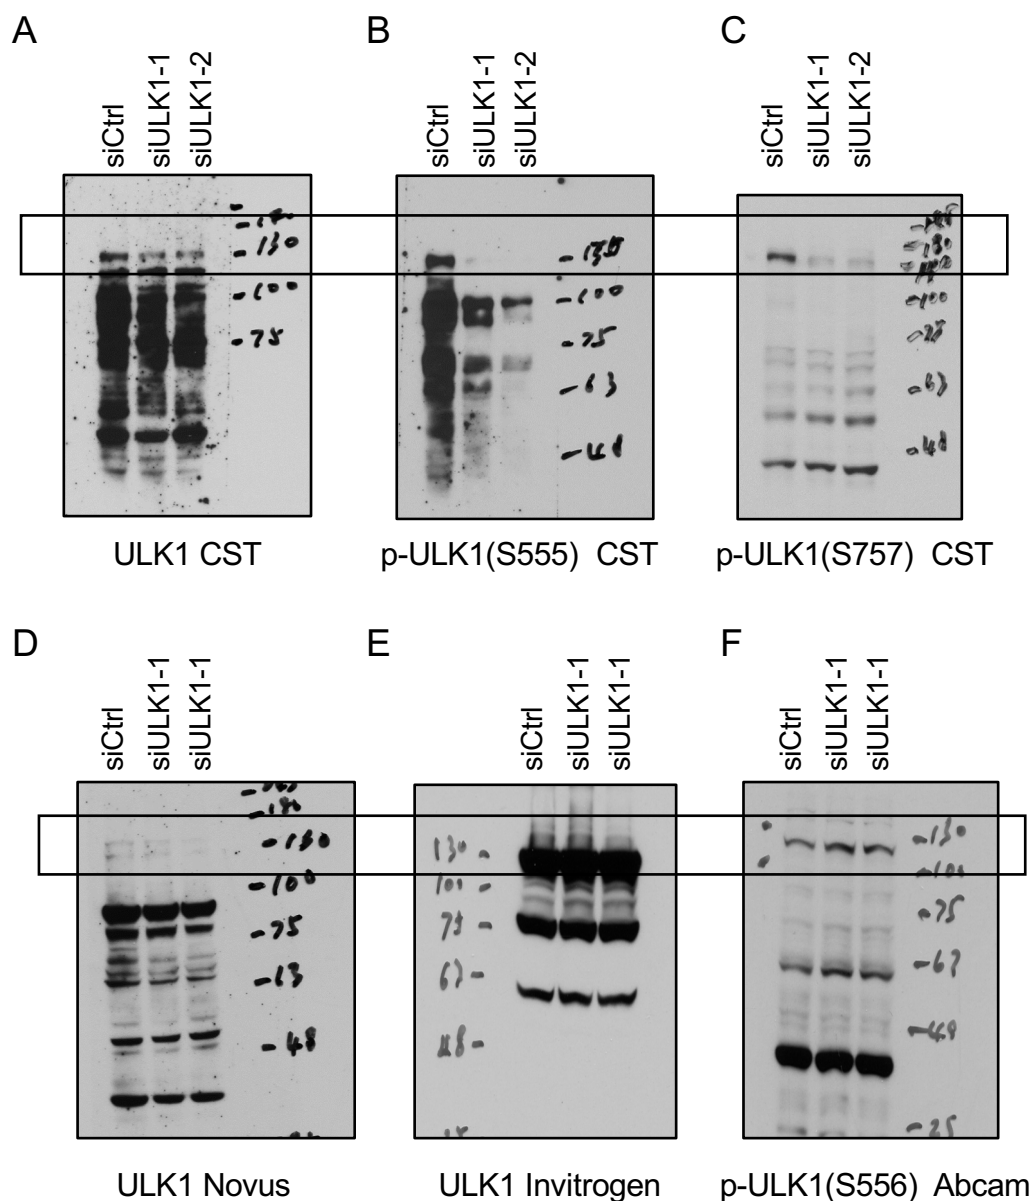

**Supplementary Figure S7.** LNCaP cells were transfected with siRNAs targeting scramble control or ULK1 for 72 hours and then probed with different ULK1 antibodies. (A) ULK1 (R600, #4773, Cell Signaling Technology), (B) p-ULK1(S555) (D1H4, #5869, Cell Signaling Technology), (C) p-ULK1(S757) (#6888, Cell Signaling Technology), (D) ULK1 (#JA58-36, Novus Biologicals), (E) ULK1 (#MA532699, Invitrogen), (F) p-ULK1(S556) (#ab203207, Abcam).

# Figure S8

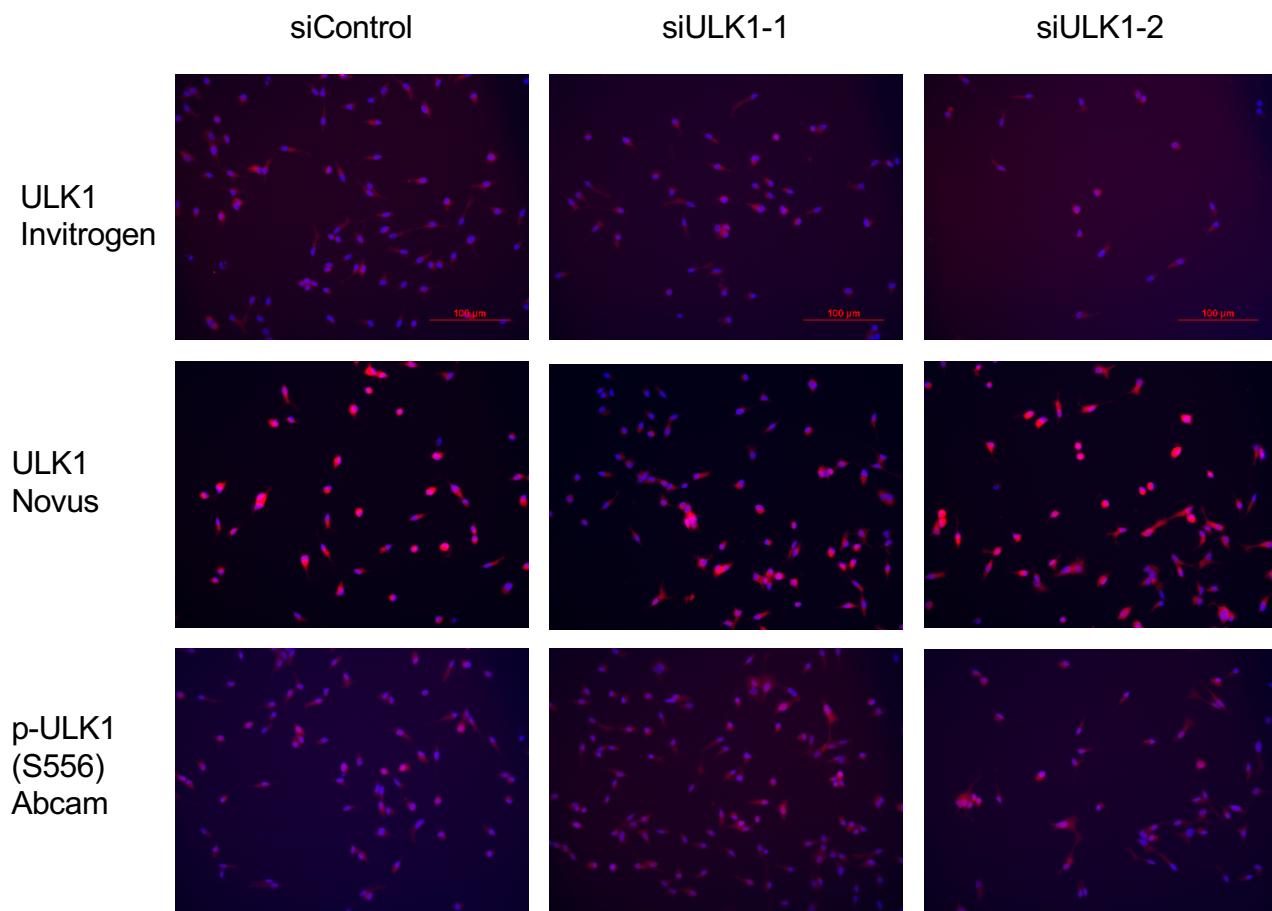

**Supplementary Figure S8.** LNCaP cells were transfected with siRNAs targeting scramble control or ULK1 for 72 hours and then stained with different ULK1 antibodies (red) and DAPI counterstain (blue) for ICC/IF.



Figure S9

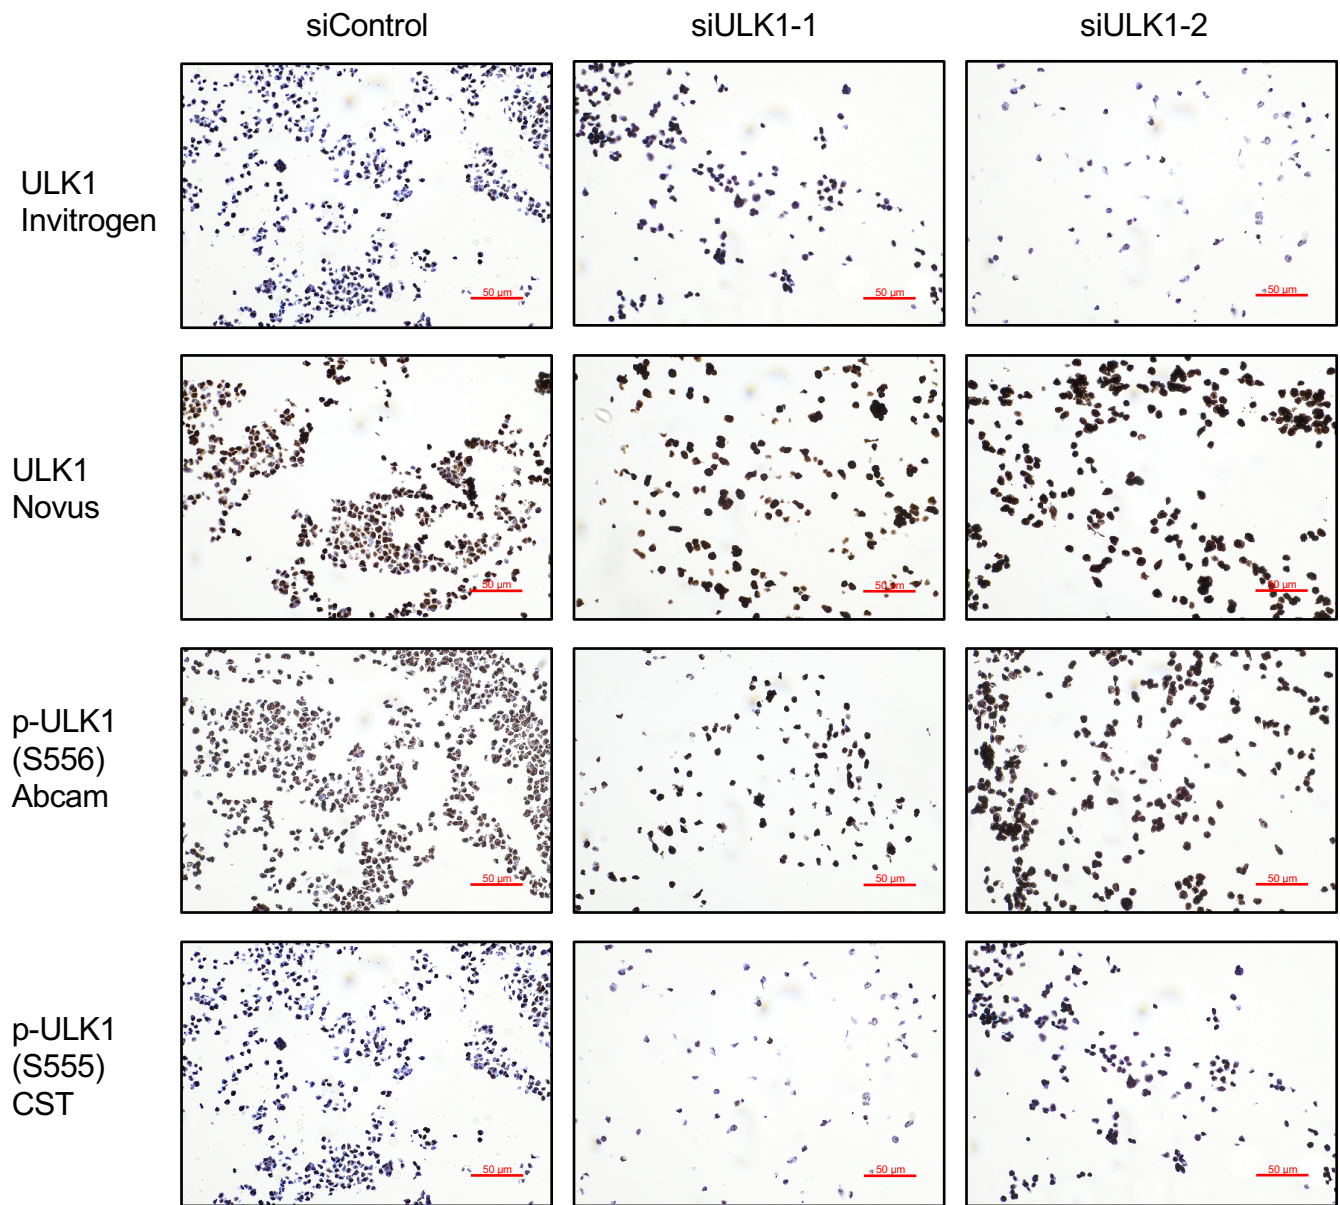

**Supplementary Figure S9.** LNCaP cells were transfected with siRNAs targeting scramble control or ULK1 for 72 hours and cell plugs were embedded in paraffin and IHC stained with indicated primary antibodies.

# Figure S10

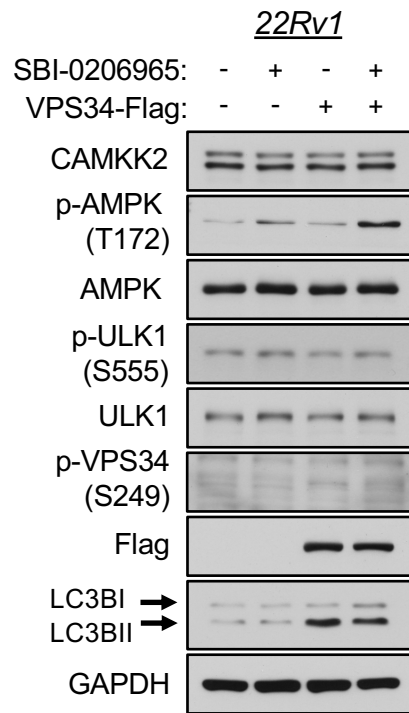

**Supplementary Figure S10.** 22Rv1 cells were transfected  $\pm$  VPS34-Flag for 48 hours. Immunoblot analysis of transfected cells with 2 hours SBI-0206965 (10  $\mu$ M) treatment.

Supplemental Table 1. siRNA, shRNA and sgRNA sequences.

---

| <b>Sequence</b>           |                                 |
|---------------------------|---------------------------------|
| <b>siRNA</b>              |                                 |
| AMPK ( <i>PRKAA1</i> ) #1 | 5'-CACAGAAGGAUUUAAAUAUUGAGGG-3' |
| AMPK ( <i>PRKAA1</i> ) #2 | 5'-ACCAUGAUUGAUGAUGAAGCCUUA-3'  |
| AMPK ( <i>PRKAA1</i> ) #3 | 5'-UUAAGGCUUCAUCAUCAUUGGU-3'    |
| ULK1 #1                   | 5'-GCAUCGGCACCAUCGUCUtt-3'      |
| ULK1 #2                   | 5'-GCAUGGACUUCGAUGAGUUtt-3'     |
| <b>shRNA</b>              |                                 |
| <i>CAMKK2</i>             | 5'-GGCATCGAGTACTTACT-3'         |
| <b>sgRNA</b>              |                                 |
| <i>CAMKK2</i>             | 5'-TGGAAGGTTTGATGTCACGG-3'      |

---
