# Supplementary material
Source: PubMed Central journal article supplement (PMC7935762)
Supplement: NIHMS1663386-supplement-2.pdf [file NIHMS1663386-supplement-2.pdf]

1 **Supplementary materials and methods**

2

3 **Cell culture, plasmids and reagents**

4 LNCaP, 22Rv1 and HEK293T cell lines were obtained from American Type Culture  
5 Collection (Baltimore, MD, USA) (CRL-1740, CRL-2505, CRL-3216). C4-2 cells were  
6 obtained from Dr. Nancy Weigel (Baylor College of Medicine). LNCaP-CAMKK2 and  
7 22Rv1-shCAMKK2 cells have previously been described (1). 22Rv1-fLuc cells were  
8 created by pBABE-fLuc-YFP plasmid (a gift from Dr. Christopher Counter, Duke School  
9 of Medicine) with retroviral transduction strategy (2). Cells were maintained as previously  
10 described (3) and validated by STR profiling (University of Texas MD Anderson Cancer  
11 Center Cell Culture Core). All cells were confirmed to be mycoplasma-free by MycoAlert  
12 Mycoplasma Detection Kit (Lonza, Morristown, NJ USA; Cat #: LT07-118). Cells were  
13 steroid-starved in phenol red-free medium containing 10% charcoal stripped-FBS (5%  
14 CS-FBS for C4-2 cells) for 72 hours before treatment unless otherwise noted. pCW-Cas9  
15 and pLX-sgRNA were gifts from Drs. Eric Lander & David Sabatini (Addgene, Watertown,  
16 MA, USA; plasmids #: 50661, 50662). pcDNA4-VPS34-Flag was a gift from Dr. Qing  
17 Zhong (Addgene plasmid #: 24398). pcDNA3.1-hULK1 and 4SA mutant were gifts from  
18 Dr. Mondira Kundu (St. Jude Children's Research Hospital). Enhanced GFP-LC3 and  
19 mCherry-GFP-LC3B constructs have been previously described(4). The synthetic  
20 androgen methyltrienolone (R1881) was purchased from PerkinElmer (Naperville, IL,  
21 USA; Cat #: NLP005005MG). Chloroquine (Cat #: C6628), doxycycline hyclate (Cat #:  
22 D9891), puromycin (Cat #: P8833), BrdU (5-bromo-2-deoxyuridine, Cat #: B5002) and  
23 polybrene (Cat #: TR-1003) were purchased from Sigma-Aldrich (St. Louis, MO, USA).

24 G418 sulfate was purchased from Gold Biotechnology (St. Louis, MO, USA; Cat #: G-  
25 418-25). Blastocidin was purchased from Millipore Sigma (St. Louis, MO, USA; Cat #:  
26 203350).

27

## 28 **Xenografts, histology and immunostaining**

29 Xenografts were performed on 6-8 weeks male NSG mice obtained from either The  
30 Jackson Laboratory (Bar Harbor, ME, USA; Cat #: 005557; Fig. 1&3E) or MDACC  
31 Experimental Radiation Oncology Breeding Core (Fig. 3A). Castrations were conducted  
32 one week before injections.  $1 \times 10^6$  cells in 200  $\mu$ l DPBS: Matrigel® 1:1 vol/vol (Corning,  
33 Corning, NY, USA; Cat #356231) were injected subcutaneously into flanks. Tumor size  
34 was measured by calipers until tumor lengths in the control group reached 1.5 cm or signs  
35 of morbidity at which point tumors were removed for further analyses.

36 For 22Rv1-shCAMKK2 xenografts, mice were randomized into normal/control or  
37 doxycycline-containing (625 mg/kg, Envigo, IN, USA) diet groups. Then, shRNA  
38 expression with surrogate red fluorescent protein (RFP) was tracked by fluorescence  
39 (IVIS Spectrum *In Vivo* Imaging Station, PerkinElmer). For chloroquine xenograft  
40 experiments, mice were randomly grouped into vehicle control or chloroquine IP  
41 treatment when the tumor volume reached 100 mm<sup>3</sup>. One hour before tissue/tumor  
42 collection/sacrifice, mice were injected with 100 mg/kg BrdU. Half of the tumor sample  
43 was snap frozen while the other half was immediately fixed in 4% PFA overnight at 4°C.  
44 For staining, samples were dehydrated and embedded in paraffin. Paraffin slides were  
45 then rehydrated and further processed with antigen retrieval in citrate buffer (DAKO,  
46 Santa Clara, CA, USA; Cat #: S169984-2). Peroxidase blocking was performed in 1%

47 H<sub>2</sub>O<sub>2</sub> plus 10% methanol solution. Proliferative cells were detected by BrdU staining. For  
48 this, slides were blocked with goat serum (DAKO; Cat #: X090710-8) and incubated  
49 overnight with anti-BrdU antibody (Calbiochem: Part of Millipore Sigma; Cat #: NA61),  
50 anti-LC3A/B (Cell Signaling Technology, Cat #: 12741) or anti-p62 (Enzo Biochem,  
51 Farmingdale, NY, USA; Cat #: BML-PW9860-0100). After washing with PBST (PBS with  
52 0.02% Tween 20), secondary antibodies (Mouse-on-Mouse HRP Polymer, Biocare  
53 Medical, CA, USA, Cat#: MM620; SuperBoost™ Goat anti-Rabbit Poly HRP, Thermo  
54 Fisher Scientific, Waltham, MA, USA; Cat#: B40962) were incubated for 30 minutes.  
55 Sections were developed by DAB (Vectorlabs, Burlingame, CA, USA; Cat #: SK-4100).  
56 Cell death was detected by TUNEL staining using the *In Situ* Cell Death Detection Kit,  
57 Fluorescein (Roche, Madison, WI, USA; Cat #: 11684795910) following the  
58 manufacturer's instructions. Hematoxylin and eosin staining as well as cleaved caspase-  
59 3 staining (Biocare Medical, Pacheco, CA, USA; Cat #: CP229a,b,c) were performed by  
60 the University of Texas MD Anderson Cancer Center Department of Veterinary Medicine  
61 and Surgery Research Animal Support Facility. Microscopy was done with an Olympus  
62 BX51 microscope and cellSens imaging software/Nikon C-TEP3 microscope. For the  
63 evaluation of p62 and LC3, the staining intensity of DAB (target protein) and hematoxylin  
64 (nuclei) were measured using Image J. The percentage of the positive signals were  
65 calculated by DAB intensity divided by hematoxylin intensity. Analysis for all IHC was  
66 done on 3-10 acquired fields per section and data were averaged.

67

### 68 **Cell pellet preparation for IHC**

69 1x10<sup>8</sup> treated LNCaP cells were collected and fixed with 10% neutral buffered formalin  
70 (with 1 drop of eosin) for overnight (5). After PBS wash, an equal amount of 4% agarose  
71 was added to immobilize the cells. Cell plugs were then removed from tubes and placed  
72 in biopsy cassettes. Paraffin embedding and sectioning processes were done by the  
73 University of Texas MD Anderson Cancer Center Department of Veterinary Medicine and  
74 Surgery Research Animal Support Facility. IHC staining was performed using the above-  
75 described IHC protocol.

76

#### 77 **Generation of CRISPR/Cas9 *CAMKK2* knockout cells.**

78 pCW-Cas9 was co-transfected with lentiviral packaging plasmids into actively growing  
79 HEK293T cells using Lipofectamine 2000 transfection reagent. After 48 hours, medium  
80 containing virus was collected, filtered and added to the target cells with 8 µg/ml  
81 polybrene. After 48 hours, fresh medium with 1 µg/ml puromycin was used to select  
82 doxycycline-inducible Cas9 expressed target cells. The gRNAs targeting *CAMKK2* were  
83 designed by <http://crispor.tefor.net/>(6) and synthesized by Sigma (listed in Supplementary  
84 Table 1). The sgRNA oligos were cloned into pLX-sgRNA. pLX-*CAMKK2* sgRNAs were  
85 transfected into Cas9-inducible expressing cells by the same lentiviral transduction  
86 strategy before selection with 10 µg/ml blasticidin. Cells expressing inducible Cas9 and  
87 sgRNA were first treated with doxycycline for 7 days. This method limited the Cas9  
88 activation window and therefore greater potential for off-target CRISPR effects. After,  
89 single clones were isolated and screened to establish *CAMKK2* knockout cells. Parental  
90 Cas9-inducible cells were used as control. Each clone was validated by sequencing and  
91 western blot.

92

### 93 **Western blot analysis**

94 Western blot analysis was performed as previously described(1, 3, 4, 7). Briefly, cells  
95 were harvested in RIPA lysis buffer (50 mM Tris HCl pH 8, 150 mM NaCl, 1% NP-40,  
96 0.5% sodium deoxycholate, 0.1% SDS) supplemented with Complete Protease Inhibitor  
97 Cocktail (Sigma, Cat #: 11697498001) and PhosSTOP phosphatase inhibitor (Roche, Cat  
98 #: 4906845001). Primary antibodies were purchased from the following sources: Cell  
99 Signaling Technology (Danvers, MA, USA): ULK1 (Cat #: 4773), p-ULK1(S555) (Cat #:  
100 5869), p-ULK1(S757) (Cat #: 6888) , LC3B (Cat #: 2775), p-AMPK(T172) (Cat #: 2535),  
101 p-VPS34(S249) (Cat #: 13857), p-p70S6K(Thr389) (Cat #: 9205), p70S6(Cat #: 2708), p-  
102 S6 (S235/236) (Cat #: 4856 ) , S6 (Cat #: 2317) ; Sigma: CAMKK2 (Cat #: HPA017389),  
103 GAPDH (Cat #: G8795), FLAG (Cat #: F1804); Novus Biologicals (Littleton, CO, USA):  
104 ULK1 (Cat #: JA58-36); Abcam (Cambridge, United Kingdom): ULK1 (Cat #:ab203207);  
105 Thermo Fisher Scientific: ULK1 (Cat #: MA532699).

106

### 107 **Immunofluorescence microscopy**

108 For LC3 assays, GFP-LC3/mCherry-GFP-LC3 fusion constructs were expressed in cells  
109 as previously described (3, 4). Following treatments, cells were fixed with 4% PFA for 15  
110 min at RT and DAPI was used as a counterstain.

111 For ULK1 antibody validation tests, LNCaP cells were treated with siRNA targeting  
112 scramble or ULK1 for 72 hours. Cells were then fixed with 4% PFA, permeabilized with  
113 0.1% Triton-100, and blocked with BSA. Following blocking, cells were incubated with  
114 various ULK1 antibodies overnight and then goat anti-rabbit IgG (H+L) cross-adsorbed

115 secondary antibody, Alexa Fluor 594 (Thermo Fisher Scientific; Cat #: A11012) for one  
116 hour.

117 Images were captured using the Olympus BX51 fluorescence microscope and  
118 cellSense imaging software. For LC3 quantification, samples were analyzed by Image J  
119 where LC3 puncta per cell were counted for 50 cells per cell line and averaged.

120

### 121 **Transmission electron microscopy (TEM)**

122 Cells were plated at 100,000 cells/well in 6-well plates and treated as indicated in  
123 figures/figure legends. Samples were fixed with a Karnovsky's fixative solution (3%  
124 glutaraldehyde plus 2% paraformaldehyde in 0.1 M cacodylate buffer, pH 7.3) at 4 °C.  
125 Samples were further processed by the University of Texas MD Anderson Cancer Center  
126 High Resolution Electron Microscopy Core Facility.

127

### 128 **Proliferation assays**

129 Proliferation assays were carried out as previously described by measuring the cellular  
130 double-stranded DNA content using a fluorescent DNA stain (4).

131

### 132 **Clonogenic assays**

133 Cells were plated at 5000 (LNCaP) or 1000 (C4-2, 22Rv1) cells/well in 6-well plates.  
134 Colonies were formed for 3-4 weeks. Media and treatments were refreshed every week.  
135 Cells were fixed with acetic acid/methanol 1:7 (vol/vol) and then stained with 0.5% crystal  
136 violet. The number of visible colonies were counted. The data were representative of  
137 three independent experiments with similar results.

138 **REFERENCES**

- 139 1. White MA, Tsouko E, Lin C, Rajapakshe K, Spencer JM, Wilkenfeld SR, et al.  
140 GLUT12 promotes prostate cancer cell growth and is regulated by androgens and  
141 CaMKK2 signaling. *Endocr Relat Cancer*. 2018;25(4):453-69.
- 142 2. Blessing AM, Ganesan S, Rajapakshe K, Ying Sung Y, Reddy Bollu L, Shi Y, et al.  
143 Identification of a Novel Coregulator, SH3YL1, That Interacts With the Androgen  
144 Receptor N-Terminus. *Mol Endocrinol*. 2015;29(10):1426-39.
- 145 3. Blessing AM, Rajapakshe K, Reddy Bollu L, Shi Y, White MA, Pham AH, et al.  
146 Transcriptional regulation of core autophagy and lysosomal genes by the androgen  
147 receptor promotes prostate cancer progression. *Autophagy*. 2017;13(3):506-21.
- 148 4. Shi Y, Han JJ, Tennakoon JB, Mehta FF, Merchant FA, Burns AR, et al. Androgens  
149 promote prostate cancer cell growth through induction of autophagy. *Mol*  
150 *Endocrinol*. 2013;27(2):280-95.
- 151 5. Koh CM. Preparation of cells for microscopy using 'cell blocks'. *Methods Enzymol*.  
152 2013;533:249-55.
- 153 6. Haeussler M, Schonig K, Eckert H, Eschstruth A, Mianne J, Renaud JB, et al.  
154 Evaluation of off-target and on-target scoring algorithms and integration into the  
155 guide RNA selection tool CRISPOR. *Genome Biol*. 2016;17(1):148.
- 156 7. Tennakoon JB, Shi Y, Han JJ, Tsouko E, White MA, Burns AR, et al. Androgens  
157 regulate prostate cancer cell growth via an AMPK-PGC-1alpha-mediated  
158 metabolic switch. *Oncogene*. 2014;33(45):5251-61.

159
